# Supplementary material for: Structural Variation of the X Chromosome Heterochromatin in the Anopheles gambiae Complex
Source: PubMed Central journal article supplement (PMC7140835; doi:10.3390/genes11030327), 2020-03-19
Supplement: genes-11-00327-s001.pdf [file genes-11-00327-s001.pdf]

## Supplementary File 1

This file contains

- Supplementary Table S1-S5

- Supplementary Figures S1-S2

- Supplementary References

**Table S1. Mosquito strains used in the study of the X chromosome heterochromatin.**

| Strain    | Species                          | BEI ID   | Isolation place                           | Isolation date |
|-----------|----------------------------------|----------|-------------------------------------------|----------------|
| DONGOLA   | <i>Anopheles arabiensis</i>      | MRA-1235 | Dongola, Sudan                            | 2009           |
| MALI      | <i>Anopheles coluzzii</i>        | MRA-860  | Niono, Mali                               | 2005           |
| MOPTI     | <i>Anopheles coluzzii</i>        | MRA-763  | N'Gabacoro<br>Droit, near<br>Bamako, Mali | 2003           |
| SUA       | <i>Anopheles coluzzii</i>        | MRA-765  | Suakoko, Liberia                          | 1987           |
| KISUMU    | <i>Anopheles gambiae</i>         | MRA-762  | Kisumu, Kenya                             | 1975           |
| PIMPERENA | <i>Anopheles gambiae</i>         | MRA-861  | PIMPERENA<br>region, Mali                 | 2005           |
| ZANU      | <i>Anopheles gambiae</i>         | MRA-594  | Zanzibar,<br>Tanzania                     | 1982           |
| MAF       | <i>Anopheles merus</i>           | MRA-1156 | Kruger National<br>Park, South<br>Africa  | 1991           |
| SANGWE    | <i>Anopheles quadriannulatus</i> | MRA-1155 | Sangwe,<br>Zimbabwe                       | 1998           |

**Table S2. Probes and primer sequences used for FISH.**

| Sequence name | GenBank accession number | PCR primer sequences | Reference to primer design |
|---------------|--------------------------|----------------------|----------------------------|
|               |                          |                      |                            |
